# Supplementary material for: Ag(i)-mediated formation of a 2D cyano-bridged multinuclear silver(i) alkynyl network coupled with the C–C bond cleavage of acetonitrile
Source: Royal Society of Chemistry journal article supplement (doi:10.1039/c4ce01707b), 2014-09-30
Supplement: c4ce01707b1.pdf [file c4ce01707b1.pdf]

## Supporting Information

5

### **Ag(I)-mediated formation of a 2D cyano-bridged multinuclear silver(I) alkynyl network coupled with the C–C bond cleavage of acetonitrile**

10 **Kun Zhou, Chao Qin, Xin-Long Wang,\* Li-Kai Yan, Kui-Zhan Shao and Zhong-Min Su\***

15 *Institute of Functional Material Chemistry, Key Lab of Polyoxometalate Science of Ministry of Education, Faculty of Chemistry, Northeast Normal University; Changchun, 130024, Jilin, China. Fax: (+86) 431-85684009; Tel: (+86) 431-85099108; E-mail: [wangxl824@nenu.edu.cn](mailto:wangxl824@nenu.edu.cn); [zmsu@nenu.edu.cn](mailto:zmsu@nenu.edu.cn).*

20

### Table of contents

25

|                                                                 |       |
|-----------------------------------------------------------------|-------|
| 1. Synthetic procedures .....                                   | S2    |
| 30 2. Crystallographic studies.....                             | S2    |
| 3. Selected bond lengths (Å) and angles (°) for compound 1..... | S3-S5 |

35

40

## 1. Synthetic procedures

**Materials and Measurements:** In this paper, all reagents and solvents for synthesis were obtained from commercial sources and used without further purification, such as 3, 3-Dimethyl-1-butyne (Aladdin, >95%). All other reagents were of analytical grade and used as received.  $[\text{AgC}\equiv\text{C}'\text{Bu}]_n$ , was synthesized according to the literature.<sup>1</sup> Elemental analyses (C, H, and N) were performed on a Perkin-Elmer 2400 CHN elemental analyzer. The FT-IR spectra were recorded from KBr pellets in the range of 4000–400  $\text{cm}^{-1}$  on a Mattson Alpha-Centauri spectrometer. Luminescence was measured on an F-7000 FL Spectrophotometer.

**Caution!** *Owing to silver(I) alkynyls have the potential explosive nature, great care should be taken, handled with care and only small amounts should be used.*

### 10 $[\text{Ag}_{15}(\text{C}\equiv\text{C}'\text{Bu})_{10}(\text{CF}_3\text{COO})_2(\text{CN})_3]_n$ (**1**)

$[\text{AgC}\equiv\text{C}'\text{Bu}]_n$  (0.0599 g, 0.3169 mmol) was dissolved in a solution of  $\text{AgCF}_3\text{COO}$  (0.1046 g, 0.4736 mmol) in acetonitrile (12 mL) under ultrasonication. Then  $\text{H}_2\text{O}$  (1 mL) was added to the above resulting solution. The mixture was stirred for 3 h to give a gray suspension. The reaction mixture ( $\text{pH} \approx 7.6$ ) was transferred to a Teflon-lined stainless autoclave (25 mL) and kept at 85 °C for 52 h. After cooling to room temperature, the solution ( $\text{pH} \approx 5.9$ ) was filtered and the filtrate evaporated slowly at room temperature in an Erlenmeyer flask. A few weeks later, we have successfully achieved compound **1**. They were deposited as colorless strip crystals. Yield: *ca.* 9% (based on Ag). Elemental analysis (%) calcd for  $\text{C}_{67}\text{H}_{90}\text{F}_6\text{O}_4\text{N}_3\text{Ag}_{15}$ : C, 29.44; H, 3.32; N, 1.54. Found: C, 29.01; H, 3.72; N, 1.37. IR (KBr):  $\nu = 2098 \text{ cm}^{-1}$  (s,  $\text{C}\equiv\text{N}$ );  $2009 \text{ cm}^{-1}$  (vs,  $\text{C}\equiv\text{C}$ );  $1680 \text{ cm}^{-1}$  (w,  $\text{C}=\text{O}$ ).

## 20 2. Crystallographic studies

Single-crystal X-ray diffraction data for **1** was recorded on a Bruker Apex CCD II area-detector diffractometer with graphite-monochromated Mo-K $\alpha$  radiation ( $\lambda = 0.71073 \text{ \AA}$ ) at 293(2) K. Absorption corrections were applied using multi-scan technique and performed by using the SADABS program. The structure of compound **1** was solved by direct methods and refined on  $F^2$  by full-matrix least squares methods using the SHELXTL package.<sup>2</sup>

Crystal data for **1**:  $\text{C}_{67}\text{H}_{90}\text{F}_6\text{O}_4\text{N}_3\text{Ag}_{15}$ ; monoclinic, space group  $P2_1/c$ ,  $M = 2733.47$ ,  $a = 14.6834(14) \text{ \AA}$ ,  $b = 14.9015(14) \text{ \AA}$ ,  $c = 20.0367(18) \text{ \AA}$ ,  $\alpha = 90^\circ$ ,  $\beta = 107.3150(10)^\circ$ ,  $\gamma = 90^\circ$ ,  $V = 4185.4(7) \text{ \AA}^3$ ,  $Z = 2$ , 20654 reflns measured, 7327 unique reflections ( $R_{\text{int}} = 0.0511$ ),  $R_1 = 0.0553$ ,  $wR_2 = 0.1356$ , goodness-of-fit = 1.028 for 4486 observed reflections with  $I > 2\sigma(I)$ . CCDC-926486 (**1**) contains the supplementary crystallographic data for this paper. These data can be obtained free of charge from the Cambridge Crystallographic Data Centre via [www.ccdc.cam.ac.uk/ data\\_request/cif](http://www.ccdc.cam.ac.uk/data_request/cif) for **1**. The C and N atoms of three cyanogroup (C33–N1, C34–N2 and C35–N3) were processed into two disordered parts in the ratio of 0.5:0.5.

### 3. Selected bond lengths (Å) and angles (°) for compound 1

**Table S1.** Selected bond lengths (Å) and angles (°) for compound 1

|    |               |            |     |                       |           |
|----|---------------|------------|-----|-----------------------|-----------|
|    | Ag(1)-C(27)   | 2.076(10)  |     | C(27)-Ag(3)#1         | 2.476(11) |
|    | Ag(1)-C(27)#1 | 2.076(10)  |     | C(33)-C(34)#2         | 1.185(14) |
| 5  | Ag(1)-Ag(3)#1 | 2.9130(9)  |     | C(34)-C(33)#3         | 1.185(14) |
|    | Ag(1)-Ag(3)   | 2.9130(9)  |     | C(35)-C(35)#4         | 1.19(2)   |
|    | Ag(1)-Ag(5)#1 | 2.9665(9)  | 60  | C(27)-Ag(1)-Ag(3)#1   | 56.6(3)   |
|    | Ag(1)-Ag(5)   | 2.9665(9)  |     | C(27)#1-Ag(1)-Ag(3)#1 | 123.4(3)  |
|    | Ag(1)-Ag(7)   | 3.0383(9)  |     | C(27)-Ag(1)-Ag(3)     | 123.4(3)  |
| 10 | Ag(1)-Ag(7)#1 | 3.0384(9)  |     | C(27)#1-Ag(1)-Ag(3)   | 56.6(3)   |
|    | Ag(1)-Ag(2)   | 3.2035(9)  |     | Ag(3)#1-Ag(1)-Ag(3)   | 180       |
|    | Ag(1)-Ag(2)#1 | 3.2035(9)  | 65  | C(27)-Ag(1)-Ag(5)#1   | 53.4(3)   |
|    | Ag(1)-Ag(4)#1 | 3.2450(9)  |     | C(27)#1-Ag(1)-Ag(5)#1 | 126.6(3)  |
|    | Ag(1)-Ag(4)   | 3.2450(9)  |     | Ag(3)#1-Ag(1)-Ag(5)#1 | 66.63(3)  |
| 15 | Ag(2)-C(15)#1 | 2.049(11)  |     | Ag(3)-Ag(1)-Ag(5)#1   | 113.37(3) |
|    | Ag(2)-C(3)    | 2.069(12)  |     | C(27)-Ag(1)-Ag(5)     | 126.6(3)  |
|    | Ag(2)-Ag(3)#1 | 3.0632(12) | 70  | C(27)#1-Ag(1)-Ag(5)   | 53.4(3)   |
|    | Ag(2)-Ag(7)   | 3.1384(12) |     | Ag(3)#1-Ag(1)-Ag(5)   | 113.37(3) |
|    | Ag(2)-Ag(8)   | 3.1609(14) |     | Ag(3)-Ag(1)-Ag(5)     | 66.63(3)  |
| 20 | Ag(2)-Ag(4)#1 | 3.2020(12) |     | Ag(5)#1-Ag(1)-Ag(5)   | 180       |
|    | Ag(2)-Ag(5)   | 3.2616(12) |     | C(27)-Ag(1)-Ag(7)     | 66.3(3)   |
|    | Ag(3)-O(1)    | 2.305(8)   | 75  | C(27)#1-Ag(1)-Ag(7)   | 113.7(3)  |
|    | Ag(3)-C(9)    | 2.360(12)  |     | Ag(3)#1-Ag(1)-Ag(7)   | 107.24(3) |
|    | Ag(3)-C(27)#1 | 2.476(11)  |     | Ag(3)-Ag(1)-Ag(7)     | 72.76(3)  |
| 25 | Ag(3)-C(15)   | 2.478(13)  |     | Ag(5)#1-Ag(1)-Ag(7)   | 110.34(3) |
|    | Ag(3)-Ag(2)#1 | 3.0632(12) |     | Ag(5)-Ag(1)-Ag(7)     | 69.66(3)  |
|    | Ag(3)-Ag(5)   | 3.2297(14) | 80  | C(27)-Ag(1)-Ag(7)#1   | 113.7(3)  |
|    | Ag(3)-Ag(6)   | 3.2842(14) |     | C(27)#1-Ag(1)-Ag(7)#1 | 66.3(3)   |
|    | Ag(3)-Ag(4)   | 3.2923(12) |     | Ag(3)#1-Ag(1)-Ag(7)#1 | 72.76(3)  |
| 30 | Ag(4)-C(9)    | 2.057(12)  |     | Ag(3)-Ag(1)-Ag(7)#1   | 107.24(3) |
|    | Ag(4)-C(21)   | 2.091(11)  |     | Ag(5)#1-Ag(1)-Ag(7)#1 | 69.66(3)  |
|    | Ag(4)-Ag(5)#1 | 3.0234(12) | 85  | Ag(5)-Ag(1)-Ag(7)#1   | 110.34(3) |
|    | Ag(4)-Ag(6)   | 3.0516(14) |     | Ag(7)-Ag(1)-Ag(7)#1   | 180       |
|    | Ag(4)-Ag(8)#1 | 3.1016(14) |     | C(27)-Ag(1)-Ag(2)     | 69.0(3)   |
| 35 | Ag(4)-Ag(2)#1 | 3.2020(12) |     | C(27)#1-Ag(1)-Ag(2)   | 111.0(3)  |
|    | Ag(5)-C(3)    | 2.305(12)  |     | Ag(3)#1-Ag(1)-Ag(2)   | 59.88(2)  |
|    | Ag(5)-O(2)    | 2.332(8)   | 90  | Ag(3)-Ag(1)-Ag(2)     | 120.12(2) |
|    | Ag(5)-C(27)#1 | 2.400(12)  |     | Ag(5)#1-Ag(1)-Ag(2)   | 116.31(2) |
|    | Ag(5)-C(21)#1 | 2.633(12)  |     | Ag(5)-Ag(1)-Ag(2)     | 63.69(2)  |
| 40 | Ag(5)-Ag(4)#1 | 3.0234(12) |     | Ag(7)-Ag(1)-Ag(2)     | 60.30(2)  |
|    | Ag(6)-C(34)   | 2.051(13)  |     | Ag(7)#1-Ag(1)-Ag(2)   | 119.70(2) |
|    | Ag(6)-C(15)   | 2.270(12)  | 95  | C(27)-Ag(1)-Ag(2)#1   | 111.0(3)  |
|    | Ag(6)-C(16)   | 2.427(13)  |     | C(27)#1-Ag(1)-Ag(2)#1 | 69.0(3)   |
|    | Ag(6)-Ag(8)#1 | 3.1269(15) |     | Ag(3)#1-Ag(1)-Ag(2)#1 | 120.12(2) |
| 45 | Ag(7)-C(33)   | 2.252(12)  |     | Ag(3)-Ag(1)-Ag(2)#1   | 59.88(2)  |
|    | Ag(7)-C(3)    | 2.324(12)  |     | Ag(5)#1-Ag(1)-Ag(2)#1 | 63.69(2)  |
|    | Ag(7)-C(9)    | 2.434(13)  | 100 | Ag(5)-Ag(1)-Ag(2)#1   | 116.31(2) |
|    | Ag(8)-C(35)   | 2.082(11)  |     | Ag(7)-Ag(1)-Ag(2)#1   | 119.70(2) |
|    | Ag(8)-C(21)#1 | 2.142(13)  |     | Ag(7)#1-Ag(1)-Ag(2)#1 | 60.30(2)  |
| 50 | Ag(8)-Ag(4)#1 | 3.1016(14) |     | Ag(2)-Ag(1)-Ag(2)#1   | 180       |
|    | Ag(8)-Ag(6)#1 | 3.1269(15) |     | C(27)-Ag(1)-Ag(4)#1   | 115.1(3)  |
|    | C(15)-Ag(2)#1 | 2.049(11)  | 105 | C(27)#1-Ag(1)-Ag(4)#1 | 64.9(3)   |
|    | C(21)-Ag(8)#1 | 2.142(13)  |     | Ag(3)#1-Ag(1)-Ag(4)#1 | 64.38(2)  |
|    | C(21)-Ag(5)#1 | 2.633(12)  |     | Ag(3)-Ag(1)-Ag(4)#1   | 115.62(2) |
| 55 | C(27)-Ag(5)#1 | 2.400(12)  |     | Ag(5)#1-Ag(1)-Ag(4)#1 | 121.95(2) |

|    |                       |           |     |                       |           |
|----|-----------------------|-----------|-----|-----------------------|-----------|
|    | Ag(5)-Ag(1)-Ag(4)#1   | 58.05(2)  |     | O(1)-Ag(3)-Ag(6)      | 111.4(2)  |
|    | Ag(7)-Ag(1)-Ag(4)#1   | 112.28(3) | 60  | C(9)-Ag(3)-Ag(6)      | 64.2(3)   |
|    | Ag(7)#1-Ag(1)-Ag(4)#1 | 67.72(3)  |     | C(27)#1-Ag(3)-Ag(6)   | 134.7(3)  |
| 5  | Ag(2)-Ag(1)-Ag(4)#1   | 59.54(2)  |     | C(15)-Ag(3)-Ag(6)     | 43.7(3)   |
|    | Ag(2)#1-Ag(1)-Ag(4)#1 | 120.46(2) |     | Ag(1)-Ag(3)-Ag(6)     | 113.98(3) |
|    | C(27)-Ag(1)-Ag(4)     | 64.9(3)   |     | Ag(2)#1-Ag(3)-Ag(6)   | 66.83(3)  |
|    | C(27)#1-Ag(1)-Ag(4)   | 115.1(3)  | 65  | Ag(5)-Ag(3)-Ag(6)     | 167.29(4) |
|    | Ag(3)#1-Ag(1)-Ag(4)   | 115.62(2) |     | O(1)-Ag(3)-Ag(4)      | 152.8(2)  |
| 10 | Ag(3)-Ag(1)-Ag(4)     | 64.38(2)  |     | C(9)-Ag(3)-Ag(4)      | 38.4(3)   |
|    | Ag(5)#1-Ag(1)-Ag(4)   | 58.05(2)  |     | C(27)#1-Ag(3)-Ag(4)   | 102.7(3)  |
|    | Ag(5)-Ag(1)-Ag(4)     | 121.95(2) |     | C(15)-Ag(3)-Ag(4)     | 78.7(3)   |
|    | Ag(7)-Ag(1)-Ag(4)     | 67.72(3)  | 70  | Ag(1)-Ag(3)-Ag(4)     | 62.71(2)  |
|    | Ag(7)#1-Ag(1)-Ag(4)   | 112.28(3) |     | Ag(2)#1-Ag(3)-Ag(4)   | 60.38(3)  |
| 15 | Ag(2)-Ag(1)-Ag(4)     | 120.46(2) |     | Ag(5)-Ag(3)-Ag(4)     | 112.82(3) |
|    | Ag(2)#1-Ag(1)-Ag(4)   | 59.54(2)  |     | Ag(6)-Ag(3)-Ag(4)     | 55.29(3)  |
|    | Ag(4)#1-Ag(1)-Ag(4)   | 180       |     | C(9)-Ag(4)-Ag(5)#1    | 134.1(3)  |
|    | C(15)#1-Ag(2)-Ag(3)#1 | 53.6(4)   | 75  | C(21)-Ag(4)-Ag(5)#1   | 58.7(3)   |
|    | C(3)-Ag(2)-Ag(3)#1    | 138.6(3)  |     | C(9)-Ag(4)-Ag(6)      | 71.8(4)   |
| 20 | C(15)#1-Ag(2)-Ag(7)   | 139.5(4)  |     | C(21)-Ag(4)-Ag(6)     | 102.4(4)  |
|    | C(3)-Ag(2)-Ag(7)      | 47.8(3)   |     | Ag(5)#1-Ag(4)-Ag(6)   | 127.88(4) |
|    | Ag(3)#1-Ag(2)-Ag(7)   | 101.19(4) |     | C(9)-Ag(4)-Ag(8)#1    | 132.8(4)  |
|    | C(15)#1-Ag(2)-Ag(8)   | 87.2(4)   | 80  | C(21)-Ag(4)-Ag(8)#1   | 43.5(3)   |
|    | C(3)-Ag(2)-Ag(8)      | 87.0(3)   |     | Ag(5)#1-Ag(4)-Ag(8)#1 | 79.32(3)  |
| 25 | Ag(3)#1-Ag(2)-Ag(8)   | 109.66(3) |     | Ag(6)-Ag(4)-Ag(8)#1   | 61.08(3)  |
|    | Ag(7)-Ag(2)-Ag(8)     | 133.30(4) |     | C(9)-Ag(4)-Ag(2)#1    | 101.4(3)  |
|    | C(15)#1-Ag(2)-Ag(4)#1 | 87.1(3)   |     | C(21)-Ag(4)-Ag(2)#1   | 86.6(3)   |
|    | C(3)-Ag(2)-Ag(4)#1    | 98.9(3)   | 85  | Ag(5)#1-Ag(4)-Ag(2)#1 | 63.11(3)  |
|    | Ag(3)#1-Ag(2)-Ag(4)#1 | 63.36(3)  |     | Ag(6)-Ag(4)-Ag(2)#1   | 68.03(3)  |
| 30 | Ag(7)-Ag(2)-Ag(4)#1   | 110.79(3) |     | Ag(8)#1-Ag(4)-Ag(2)#1 | 60.17(3)  |
|    | Ag(8)-Ag(2)-Ag(4)#1   | 58.34(3)  |     | C(9)-Ag(4)-Ag(1)      | 78.2(3)   |
|    | C(15)#1-Ag(2)-Ag(1)   | 109.0(4)  |     | C(21)-Ag(4)-Ag(1)     | 114.7(3)  |
|    | C(3)-Ag(2)-Ag(1)      | 83.3(3)   | 90  | Ag(5)#1-Ag(4)-Ag(1)   | 56.36(2)  |
|    | Ag(3)#1-Ag(2)-Ag(1)   | 55.34(2)  |     | Ag(6)-Ag(4)-Ag(1)     | 111.34(3) |
| 35 | Ag(7)-Ag(2)-Ag(1)     | 57.24(2)  |     | Ag(8)#1-Ag(4)-Ag(1)   | 116.20(3) |
|    | Ag(8)-Ag(2)-Ag(1)     | 115.70(3) |     | Ag(2)#1-Ag(4)-Ag(1)   | 59.59(2)  |
|    | Ag(4)#1-Ag(2)-Ag(1)   | 60.87(2)  |     | C(9)-Ag(4)-Ag(3)      | 45.4(3)   |
|    | C(15)#1-Ag(2)-Ag(5)   | 142.9(3)  | 95  | C(21)-Ag(4)-Ag(3)     | 142.6(3)  |
|    | C(3)-Ag(2)-Ag(5)      | 44.6(3)   |     | Ag(5)#1-Ag(4)-Ag(3)   | 102.06(3) |
| 40 | Ag(3)#1-Ag(2)-Ag(5)   | 101.89(3) |     | Ag(6)-Ag(4)-Ag(3)     | 62.22(3)  |
|    | Ag(7)-Ag(2)-Ag(5)     | 64.78(3)  |     | Ag(8)#1-Ag(4)-Ag(3)   | 105.42(4) |
|    | Ag(8)-Ag(2)-Ag(5)     | 74.98(3)  |     | Ag(2)#1-Ag(4)-Ag(3)   | 56.27(3)  |
|    | Ag(4)#1-Ag(2)-Ag(5)   | 55.77(3)  | 100 | Ag(1)-Ag(4)-Ag(3)     | 52.92(2)  |
|    | Ag(1)-Ag(2)-Ag(5)     | 54.62(2)  |     | C(3)-Ag(5)-Ag(1)      | 85.3(3)   |
| 45 | O(1)-Ag(3)-Ag(1)      | 134.5(2)  |     | O(2)-Ag(5)-Ag(1)      | 133.1(2)  |
|    | C(9)-Ag(3)-Ag(1)      | 81.6(3)   |     | C(27)#1-Ag(5)-Ag(1)   | 44.0(2)   |
|    | C(27)#1-Ag(3)-Ag(1)   | 44.4(2)   |     | C(21)#1-Ag(5)-Ag(1)   | 108.0(2)  |
|    | C(15)-Ag(3)-Ag(1)     | 106.5(3)  | 105 | C(3)-Ag(5)-Ag(4)#1    | 98.8(3)   |
|    | O(1)-Ag(3)-Ag(2)#1    | 141.3(3)  |     | O(2)-Ag(5)-Ag(4)#1    | 138.0(3)  |
| 50 | C(9)-Ag(3)-Ag(2)#1    | 98.5(3)   |     | C(27)#1-Ag(5)-Ag(4)#1 | 66.5(3)   |
|    | C(27)#1-Ag(3)-Ag(2)#1 | 67.9(3)   |     | C(21)#1-Ag(5)-Ag(4)#1 | 42.7(2)   |
|    | C(15)-Ag(3)-Ag(2)#1   | 41.8(3)   |     | Ag(1)-Ag(5)-Ag(4)#1   | 65.60(2)  |
|    | Ag(1)-Ag(3)-Ag(2)#1   | 64.77(2)  | 110 | C(3)-Ag(5)-Ag(3)      | 105.7(3)  |
|    | O(1)-Ag(3)-Ag(5)      | 77.2(2)   |     | O(2)-Ag(5)-Ag(3)      | 77.9(2)   |
|    | C(9)-Ag(3)-Ag(5)      | 103.9(3)  |     | C(27)#1-Ag(5)-Ag(3)   | 49.5(3)   |
| 55 | C(27)#1-Ag(3)-Ag(5)   | 47.5(3)   |     | C(21)#1-Ag(5)-Ag(3)   | 149.1(3)  |
|    | C(15)-Ag(3)-Ag(5)     | 144.3(3)  |     | Ag(1)-Ag(5)-Ag(3)     | 55.89(2)  |
|    | Ag(1)-Ag(3)-Ag(5)     | 57.48(2)  | 115 | Ag(4)#1-Ag(5)-Ag(3)   | 112.96(4) |
|    | Ag(2)#1-Ag(3)-Ag(5)   | 112.82(3) |     | C(3)-Ag(5)-Ag(2)      | 39.1(3)   |

|    |                     |           |    |                       |           |
|----|---------------------|-----------|----|-----------------------|-----------|
|    | O(2)-Ag(5)-Ag(2)    | 156.4(2)  | 20 | C(3)-Ag(7)-Ag(1)      | 83.3(3)   |
|    | C(27)#1-Ag(5)-Ag(2) | 100.8(3)  |    | C(9)-Ag(7)-Ag(1)      | 77.8(3)   |
|    | C(21)#1-Ag(5)-Ag(2) | 77.4(2)   |    | C(33)-Ag(7)-Ag(2)     | 107.7(3)  |
| 5  | Ag(1)-Ag(5)-Ag(2)   | 61.70(2)  |    | C(3)-Ag(7)-Ag(2)      | 41.2(3)   |
|    | Ag(4)#1-Ag(5)-Ag(2) | 61.12(3)  |    | C(9)-Ag(7)-Ag(2)      | 140.3(3)  |
|    | Ag(3)-Ag(5)-Ag(2)   | 109.53(3) | 25 | Ag(1)-Ag(7)-Ag(2)     | 62.46(2)  |
|    | C(34)-Ag(6)-Ag(4)   | 104.2(3)  |    | C(35)-Ag(8)-Ag(4)#1   | 144.1(3)  |
|    | C(15)-Ag(6)-Ag(4)   | 87.2(3)   |    | C(21)#1-Ag(8)-Ag(4)#1 | 42.2(3)   |
| 10 | C(16)-Ag(6)-Ag(4)   | 116.9(3)  |    | C(35)-Ag(8)-Ag(6)#1   | 86.0(3)   |
|    | C(34)-Ag(6)-Ag(8)#1 | 100.6(3)  |    | C(21)#1-Ag(8)-Ag(6)#1 | 98.9(3)   |
|    | C(15)-Ag(6)-Ag(8)#1 | 84.4(3)   | 30 | Ag(4)#1-Ag(8)-Ag(6)#1 | 58.67(3)  |
|    | C(16)-Ag(6)-Ag(8)#1 | 107.2(3)  |    | C(35)-Ag(8)-Ag(2)     | 101.0(3)  |
|    | Ag(4)-Ag(6)-Ag(8)#1 | 60.25(3)  |    | C(21)#1-Ag(8)-Ag(2)   | 86.8(3)   |
| 15 | C(34)-Ag(6)-Ag(3)   | 137.4(4)  |    | Ag(4)#1-Ag(8)-Ag(2)   | 61.49(3)  |
|    | C(15)-Ag(6)-Ag(3)   | 48.9(3)   |    | Ag(6)#1-Ag(8)-Ag(2)   | 67.66(3)  |
|    | C(16)-Ag(6)-Ag(3)   | 63.5(3)   | 35 | C(34)#2-C(33)-Ag(7)   | 167.3(11) |
|    | Ag(4)-Ag(6)-Ag(3)   | 62.49(3)  |    | C(33)#3-C(34)-Ag(6)   | 177.0(11) |
|    | Ag(8)#1-Ag(6)-Ag(3) | 105.03(4) |    | C(35)#4-C(35)-Ag(8)   | 174.8(15) |
|    | C(33)-Ag(7)-Ag(1)   | 158.1(3)  |    |                       |           |

Symmetry transformations used to generate equivalent atoms: #1 -x, -y, -z; #2 -x, y-1/2, -z+1/2; #3 -x, y+1/2, -z+1/2; #4 -x, -y-1, -z.

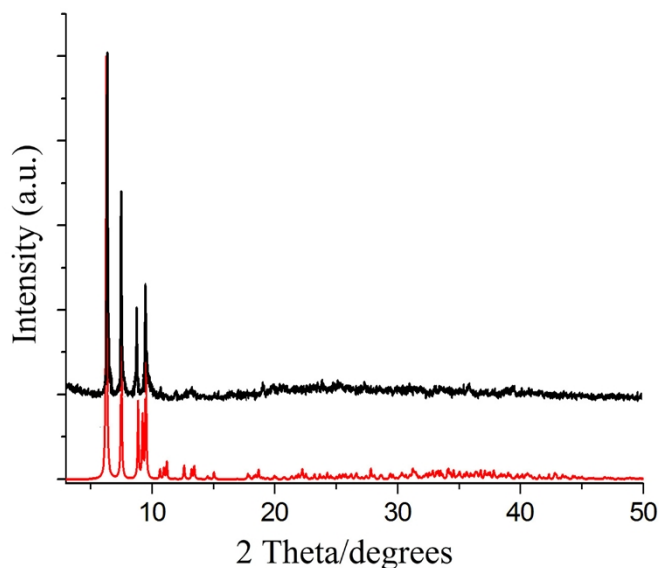

40 **Fig. S1** Experimental (black trace) and simulated (red trace) X-ray powder diffraction patterns of **1**.

### Reference:

- 45 1 (a) L. Zhao, C.-Q. Wan, J. Han, X.-D. Chen and T. C. W. Mak, *Chem. –Eur. J.*, 2008, **14**, 10437; (b) Z.-G. Jiang, K. Shi, Y.-M. Lin and Q.-M. Wang, *Chem. Commun.*, 2014, **50**, 2353.
- 2 (a) G. M. Sheldrick, *SHELX-97, Program for Crystal Structure Refinement*, University of Göttingen, Germany, 1997; (b) G. M. Sheldrick, *SHELXL-97, Program for Crystal Structure Solution*, University of Göttingen, Germany, 1997.
